# Supplementary material for: A Pepper MSRB2 Gene Confers Drought Tolerance in Rice through the Protection of Chloroplast-Targeted Genes
Source: PubMed Central journal article supplement (PMC3948683; doi:10.1371/journal.pone.0090588), 2014-03-10
Supplement: pone.0090588.s011.pdf [file pone.0090588.s011.pdf]

Table S1. Primers that were used for PCR/real-time PCR

| Primer ID          | Sequence                              | Product (bps) |
|--------------------|---------------------------------------|---------------|
| OsMSRB3_XbF        | GGGTCTAGAAAAATGGGCGTCCAGCATCT         | 705           |
| OsMSRB3-TGA-NR     | TTTGCGGCCCGCAAGCTTACTATCTTCTGAGGC     |               |
| OsMSRB5_XbF        | GGGTCTAGAAATGGGCTCGTCGGGGGAC          | 423           |
| OsMSRB5-TGA-NR     | TTGCGGCCCGCGGAGGCCGGGTGAACTTG         |               |
| CaMSR2-Xb-F        | GGGTCTAGAAATGGGTTCTCAGATTCTCAAA       | 570           |
| CaMSR2-TGA-NR      | TTTGCGGCCCGCGGAATTTGCCGGTGTA AAC      |               |
| CaMSRB2_R411       | GTCAGGAGTGC GATTAATAGC                | 201           |
| CaMSRB2_F230       | CCTGAGCAGTTCCGTATTCT                  |               |
| CaMSRB2_B1         | AAAAAGCAGGCTGCGACTTTGAATTGGTCTTTG     | 882           |
| CaMSRB2_B2         | AGAAAGCTGGGTATATCAA ACTTTGTCTAGATTATC |               |
| BAR280_F           | GAGTCGACCGTGTACGTCTC                  | 291           |
| BAR550_R           | GTCAAATCTCGGTGACGGG                   |               |
| rab21_F            | ACCACCGACACCGGCGAGAA                  | 160           |
| rab21_R            | TTGCGCTCGGCTAGCTCATC                  |               |
| RbcS_F             | CACTCACCGTGGAGGATCTT                  | 350           |
| RbcS_R             | AGCGCGATGCTTGATCTTAG                  |               |
| OsMSRB3-564R*      | CGCACAGGTGATCTCTATTC                  | 157           |
| OsMSRB3-408F*      | GGGTGTTTATGAATGTGCTG                  |               |
| OsMSRB5-360R*      | ATCAGTAGGCGTCTTGAAGC                  | 174           |
| OsMSRB5-187F*      | TCCACAACCAAGTTTGATTC                  |               |
| Os01g0938100_F*    | GAGGGCGTGCTCCAGTCGGT                  | 223           |
| Os01g0938100_R*    | GCACACAGTACATGCTCAAGGCAGT             |               |
| Os04g0414700_F*    | GCGCTCGACTCGCCGTTCTG                  | 231           |
| Os04g0414700_R*    | ACAACAGCGTACATCCGCAAGAGG              |               |
| Os08g0502700_F*    | GGGTGCCCTGAGTGGAGTGGA                 | 206           |
| Os08g0502700_R*    | TGCCGCTGTTCCGTTCTGCC                  |               |
| Os03g0778100_F*    | GCGAGAAGAAGCCGGCCATGA                 | 210           |
| Os03g0778100_R*    | AGCCCTCTTCCCTCCACTGCCA                |               |
| Os04g0644600_F*    | TTGCATGGGGGATTTCTGAT                  | 205           |
| Os04g0644600_R*    | TACCTGTGACTTGTACAGGA                  |               |
| Os08g0248800_F*    | CAAACACGCATTCAAAAAGA                  | 183           |
| Os08g0248800_R*    | ATATGCAGCTCTCGGATCAC                  |               |
| Os07g0693800_F*    | GACAGTGGACAGGGACTATG                  | 228           |
| Os07g0693800_R*    | CTGACATAGTGGTCGCGTT                   |               |
| Os02g0596000_F*    | TGAAAGAAGGGCTGGGCTAC                  | 215           |
| Os02g0596000_R*    | ACATTACGAGCCGCAACA                    |               |
| Os03g0736400_F*    | AACACCGCCATATCTTGAGG                  | 208           |
| Os03g0736400_R*    | CTTCTTCTCAGCCCAGGTTG                  |               |
| Os04g0465500_F*    | TTGACTTCCCGTACATTTGC                  | 202           |
| Os04g0465500_R*    | CTGTCAGTCTGGACAATGTT                  |               |
| tubulin_F*         | ACCGTGATTGATGAGGTGAG                  | 205           |
| tubulin_R *        | CAGCGTTGAACACAAGGAAG                  |               |
| Os06g0107700_stu_F | ccaggcctATGGCCCGTCCACG                | 1086          |
| Os06g0107700_N_R   | ttgcccgcgcGTAGACTTCCACGTTCCAT         |               |
| Os11g0707000_Rv_F  | gatatcATGGCTGCTGCCTTCTC               | 1299          |
| Os11g0707000_N_R   | aagcggccgcGCTGGATGGCGCAGAAC           |               |
| Os12g0625000_stu_F | ccaggcctatgTCCACGAGCCGCCATTTT         | 1041          |
| Os12g0625000_N_R   | tgcggccgcTTCAACCACCATGTTTTT CAG       |               |
| Os02g0168800_stu_F | ccaggcct TCTTCCCCGGAGATGCC            | 1074          |
| Os02g0168800_N_R   | tTgcggccgcTTGCAAGCTATCAAAGAAG         |               |
| Os02g0436400_stu_F | ccaggcct ATGCTCGCTCCACCTTTG           | 1029          |
| Os02g0436400_N_R   | tgcggccgcTCTCATGTTGCCCTCTCTTA         |               |
