# Supplementary material for: A Pepper MSRB2 Gene Confers Drought Tolerance in Rice through the Protection of Chloroplast-Targeted Genes
Source: PubMed Central journal article supplement (PMC3948683; doi:10.1371/journal.pone.0090588), 2014-03-10
Supplement: pone.0090588.s013.pdf [file pone.0090588.s013.pdf]

Table S3. Identified proteins using LC-MS/MS analysis.

| Identified Proteins                                                       | Accession Number | Molecular Weight    | WT            |        | MSRB2-Bar-8 |        |        |
|---------------------------------------------------------------------------|------------------|---------------------|---------------|--------|-------------|--------|--------|
|                                                                           |                  |                     | 0 Day         | 2Day   | MsrB2-B     | M82D   |        |
| <b>Ribulose biphosphate carboxylase/oxygenase activase, chloroplastic</b> | RCA_ORYSJ        | <b>Os11g0707000</b> | 51 kDa        | 38.1   | 65.44       | 97.47  | 97.84  |
| Fructose-biphosphate aldolase, chloroplastic                              | ALFC_ORYSJ       | Os11g0171300        | 42 kDa        | 142.31 | 119.97      | 113.71 | 125.94 |
| Serpin-ZXA                                                                | SPZXA_ORYSJ      | Os03g0610650        | 42 kDa        | 1.12   | 0           | 7.64   | 5.2    |
| Probable protein phosphatase 2C                                           | P2C05_ORYSJ      | Os01g0552300        | 42 kDa        | 0      | 0           | 0      | 2.08   |
| Actin-1                                                                   | ACT1_ORYSI       | Os03g0718100        | 42 kDa        | 2.24   | 2.73        | 2.87   | 0      |
| Ferredoxin--NADP reductase, embryo isozyme, chloroplastic                 | FENR3_ORYSJ      | Os07g0147900        | 42 kDa        | 2.24   | 0           | 0      | 0      |
| UDP-arabinopyranose mutase 1                                              | RGP1_ORYSJ       | Os03g0599800        | 41 kDa        | 0      | 4.54        | 4.78   | 3.12   |
| Alcohol dehydrogenase class-3                                             | ADHX_ORYSJ       | Os02g0815500        | 41 kDa        | 2.24   | 4.54        | 0.96   | 2.08   |
| Putative 12-oxophytodienoate reductase 11                                 | OPR11_ORYSJ      | Os04g0542200        | 41 kDa        | 0      | 2.73        | 0      | 0      |
| Quercetin 3-O-methyltransferase 1                                         | OMT1_ORYSJ       | Os08g0157500        | <b>40 kDa</b> | 7.84   | 10          | 5.73   | 10.41  |
| Peroxisomal (S)-2-hydroxy-acid oxidase GLO4                               | GLO4_ORYSI       |                     | <b>40 kDa</b> | 1.12   | 0.91        | 0.96   | 3.12   |
| Actin-related protein 7                                                   | ARP7_ORYSI       |                     | <b>40 kDa</b> | 0      | 0           | 1.91   | 2.08   |
| Protein disulfide isomerase-like 2-1                                      | PDI21_ORYSJ      | s05g0156300         | <b>40 kDa</b> | 0      | 1.82        | 0.96   | 2.08   |
| <b>Ferredoxin--NADP reductase, leaf isozyme, chloroplastic</b>            | FENR1_ORYSJ      | Os06g0107700        | <b>40 kDa</b> | 15.69  | 6.36        | 2.87   | 3.12   |
| Peroxisomal (S)-2-hydroxy-acid oxidase GLO5                               | GLO5_ORYSI       | Os07g0152900        | <b>40 kDa</b> | 34.74  | 35.45       | 33.44  | 30.18  |
| Peroxisomal (S)-2-hydroxy-acid oxidase GLO1                               | GLO1_ORYSI       | Os03g0786100        | <b>40 kDa</b> | 34.74  | 46.35       | 47.78  | 40.59  |
| Probable cinnamyl alcohol dehydrogenase 1                                 | CADH1_ORYSJ      | Os10g0194200        | <b>39 kDa</b> | 1.12   | 5.45        | 2.87   | 6.25   |
| Fructose-biphosphate aldolase cytoplasmic isozyme                         | ALF_ORYSJ        | Os05t0402700        | <b>39 kDa</b> | 20.17  | 28.17       | 28.67  | 18.74  |
| Methylthioribose-1-phosphate isomerase                                    | MTNA_ORYSI       | Os11g0216900        | <b>39 kDa</b> | 3.36   | 8.18        | 5.73   | 4.16   |
| Probable UDP-arabinopyranose mutase 2                                     | RGP2_ORYSJ       | Os04g0660400        | <b>39 kDa</b> | 2.24   | 4.54        | 0.96   | 2.08   |
| Glutamine synthetase cytosolic isozyme 1-1                                | GLN11_ORYSJ      | Os02g0735200        | <b>39 kDa</b> | 1.12   | 3.64        | 3.82   | 3.12   |
| Cycloartenol-C-24-methyltransferase 1                                     | SMT1_ORYSJ       | Os07g0206700        | <b>39 kDa</b> | 0      | 0           | 1.91   | 0      |
| <b>Porphobilinogen deaminase, chloroplastic</b>                           | HEM3_ORYSJ       | <b>Os02g0168800</b> | <b>38 kDa</b> | 12.33  | 4.54        | 5.73   | 15.61  |
| Diaminopimelate epimerase, chloroplastic                                  | DAPF_ORYSJ       | Os12g0567200        | <b>38 kDa</b> | 8.96   | 1.82        | 1.91   | 0      |
| <b>Probable dihydrodipicolinate reductase 1, chloroplastic</b>            | DAPB1_ORYSJ      | Os02g0436400        | <b>37 kDa</b> | 2.24   | 0.91        | 5.73   | 1.04   |
| Fructose-1,6-bisphosphatase, cytosolic                                    | F16P2_ORYSI      | Os01g0866400        | <b>37 kDa</b> | 11.21  | 8.18        | 5.73   | 12.49  |
| Malate dehydrogenase, glyoxysomal                                         | MDHG_ORYSJ       | Os12g0632700        | <b>37 kDa</b> | 3.36   | 3.64        | 0.96   | 5.2    |
| Electron transfer flavoprotein subunit alpha, mitochondrial               | ETFA_ORYSI       | Os03g0835400        | <b>37 kDa</b> | 3.36   | 0           | 0      | 0      |
| Glyceraldehyde-3-phosphate dehydrogenase, cytosolic                       | G3PC_ORYSI       | Os08g0126300        | <b>36 kDa</b> | 22.41  | 19.09       | 25.8   | 19.78  |
| Fructokinase-2                                                            | SCRK2_ORYSI      | Os08g0113100        | <b>36 kDa</b> | 13.45  | 10.91       | 8.6    | 15.61  |
| Probable voltage-gated potassium channel subunit beta                     | KCAB_ORYSJ       | Os02g0817500        | <b>36 kDa</b> | 3.36   | 2.73        | 0.96   | 7.29   |
| Ribose-phosphate pyrophosphokinase 4                                      | KPRS4_ORYSJ      | Os02g0714600        | <b>36 kDa</b> | 0      | 0.91        | 1.91   | 1.04   |
| Serine/threonine-protein phosphatase PP1                                  | PP1_ORYSJ        | Os03g0268000        | <b>36 kDa</b> | 0      | 0           | 0      | 3.12   |
| Malate dehydrogenase, cytoplasmic                                         | MDHC_ORYSJ       | Os10g0478200        | <b>36 kDa</b> | 16.81  | 23.63       | 21.98  | 21.86  |
| Guanine nucleotide-binding protein subunit beta-like protein A            | GBLPA_ORYSJ      | Os01g0686800        | <b>36 kDa</b> | 16.81  | 9.09        | 7.64   | 7.29   |
| Probable serine acetyltransferase 5                                       | SAT5_ORYSJ       | Os05g0533500        | <b>36 kDa</b> | 4.48   | 0.91        | 0      | 0      |
| Guanine nucleotide-binding protein subunit beta-like protein B            | GBLPB_ORYSJ      | Os05g0552300        | <b>36 kDa</b> | 6.72   | 2.73        | 3.82   | 2.08   |
| Fructokinase-1                                                            | SCRK1_ORYSI      | Os01g0894300        | <b>35 kDa</b> | 11.21  | 6.36        | 15.29  | 7.29   |
| Probable uridine nucleosidase 1                                           | URH1_ORYSJ       | Os08g0557900        | <b>35 kDa</b> | 3.36   | 1.82        | 1.91   | 2.08   |
| 60S ribosomal protein L5-2                                                | RL52_ORYSJ       | Os01g0896700        | <b>35 kDa</b> | 6.72   | 10.91       | 6.69   | 10.41  |
| Probable protein phosphatase 2C                                           | P2C01_ORYSJ      | Os01g0164600        | <b>35 kDa</b> | 3.36   | 1.82        | 0.96   | 0      |
| Homeobox protein knotted-1-like 11                                        | KNOSB_ORYSJ      | Os06g0646600        | <b>35 kDa</b> | 4.48   | 0           | 0.96   | 0      |
| <b>Cysteine synthase</b>                                                  | CYSK1_ORYSJ      | <b>Os12g0625000</b> | 34 kDa        | 3.36   | 1.82        | 0      | 2.08   |
| Probable succinyl-CoA ligase [ADP-forming] subunit alpha, mitochondrial   | SUCA_ORYSJ       | Os07g0577700        | 34 kDa        | 15.69  | 0.91        | 4.78   | 4.16   |
| Probable pyridoxal biosynthesis protein PDX1.1                            | PDX11_ORYSJ      | Os07g0100200        | 34 kDa        | 2.24   | 2.73        | 2.87   | 8.33   |
| 60S acidic ribosomal protein P0                                           | RLA0_ORYSJ       | Os08g0130500        | 34 kDa        | 8.96   | 10.91       | 9.56   | 6.25   |
| PHD finger protein ALFIN-LIKE 9                                           | ALFL9_ORYSI      |                     | 30 kDa        | 0      | 2.73        | 0.96   | 3.12   |
| Unknown protein DS12 from 2D-PAGE of leaf, chloroplastic                  | UP12_ORYSI       | Os08g0242700        | 30 kDa        | 5.6    | 10          | 6.69   | 9.37   |
