# Supplementary material for: A Pepper MSRB2 Gene Confers Drought Tolerance in Rice through the Protection of Chloroplast-Targeted Genes
Source: PLoS One. 2014 Mar 10;9(3):e90588. doi: 10.1371/journal.pone.0090588 (PMC3948683; doi:10.1371/journal.pone.0090588)
Supplement: Table S2 — Mapping results of T-DNA flanking sequences by FSTVAL. (PDF) [file pone.0090588.s012.pdf]

Table S2. Mapping results of T-DNA flanking sequences by FSTVAL

| Query Name      | Read length | A/NA   | T-DNA end | Adaptor start | matching length | query start | query end | Chr.   | chr start | chr end  | type                         | copies |
|-----------------|-------------|--------|-----------|---------------|-----------------|-------------|-----------|--------|-----------|----------|------------------------------|--------|
| MSRB2-Bar-1-R1  | 623         | A      | 72        | 600           | 299             | 301         | 599       | 10     | 15728411  | 15728709 | 650bp at 5nd of Os10g0429500 | 1      |
| MSRB2-Bar-1-L1  | 620         | Vector | 18        | 597           |                 |             |           |        |           |          |                              |        |
| MSRB2-Bar-3-R1  | 188         | Vector | 71        | 155           |                 |             |           |        |           |          |                              | 2      |
| MSRB2-Bar-3-R2  | 126         | NA     | 72        | -1            |                 |             |           |        |           |          |                              |        |
| MSRB2-Bar-3-L1  | 502         | A      | -1        | 469           | 299             | 170         | 468       | 11     | 17171622  | 17171324 |                              |        |
| MSRB2-Bar-3-L2  | 278         | A      | -1        | 249           | 248             | 1           | 248       | 4      | 21629644  | 21629891 |                              |        |
| MSRB2-Bar-4-R1  | 256         | A      | 40        | 223           | 161             | 62          | 222       | 2      | 33365046  | 33365206 | intergenic region            | 1      |
| MSRB2-Bar-4-L1  | 586         | A      | 28        | 564           | 538             | 26          | 563       | 2      | 33365042  | 33364505 |                              |        |
| MSRB2-Bar-5-R1  | 345         | A      | 69        | 312           | 244             | 68          | 311       | 11     | 17170810  | 17170567 |                              | 3      |
| MSRB2-Bar-5-R2  | 213         | NA     | 67        | -1            |                 |             |           |        |           |          |                              |        |
| MSRB2-Bar-5-L1  | 81          | NA     | -1        | -1            |                 |             |           |        |           |          |                              |        |
| MSRB2-Bar-5-L2  | 415         | A      | -1        | 395           |                 |             |           |        |           |          |                              |        |
| MSRB2-Bar-5-L3  | 220         | A      | -1        | 188           |                 |             |           |        |           |          |                              |        |
| MSRB2-Bar-5-L4  | 126         | A      | -1        | 97            | 96              | 1           | 96        | 12     | 787461    | 787556   |                              |        |
| MSRB2-Bar-6-R1  | 446         | A      | 67        | 427           | 362             | 65          | 426       | 11     | 20076386  | 20076025 |                              | 2      |
| MSRB2-Bar-6-R2  | 180         | Vector | 69        | 147           |                 |             |           |        |           |          |                              |        |
| MSRB2-Bar-6-L1  | 484         | A      | -1        | 465           | 299             | 166         | 464       | 11     | 17171622  | 17171324 |                              |        |
| MSRB2-Bar-6-L2  | 0           | NA     | -1        | -1            |                 |             |           |        |           |          |                              |        |
| MSRB2-Bar-6-L3  | 146         | A      | -1        | 113           |                 |             |           |        |           |          |                              |        |
| MSRB2-Bar-7-R1  | 148         | Vector | 75        | 119           |                 |             |           |        |           |          |                              | 2      |
| MSRB2-Bar-7-L1  | 581         | A      | 14        | 552           |                 |             |           |        |           |          |                              |        |
| MSRB2-Bar-7-L2  | 248         | A      | 14        | 216           | 207             | 9           | 215       | 11     | 27175490  | 27175696 |                              |        |
| MSRB2-Bar-8-R1  | 836         | A      | 29        | -1            | 601             | 29          | 629       | 1      | 41711122  | 41711722 |                              | 1      |
| MSRB2-Bar-8-L1  | 472         | A      | -1        | -1            | 333             | 140         | 472       | 1      | 41713700  | 41713368 | intergenic region            |        |
| MSRB2-Bar-9-R1  | 61          | NA     | 48        | -1            |                 |             |           |        |           |          |                              | 3      |
| MSRB2-Bar-9-R2  | 606         | A      | 45        | -1            | 564             | 43          | 606       | 4      | 20708627  | 20709188 |                              |        |
| MSRB2-Bar-9-L1  | 614         | A      | 18        | 597           |                 |             |           |        |           |          |                              |        |
| MSRB2-Bar-9-L2  | 447         | A      | -1        | 427           | 299             | 128         | 426       | 11     | 17171622  | 17171324 |                              |        |
| MSRB2-Bar-9-L3  | 221         | A      | -1        | 189           | 189             | 1           | 188       | 4      | 20708587  | 20708399 |                              |        |
| MSRB2-Bar-12-R1 | 39          | NA     | 35        | -1            |                 |             |           |        |           |          |                              | 3      |
| MSRB2-Bar-12-L1 | 751         | A      | -1        | -1            | 736             | 16          | 751       | 9      | 12830881  | 12830146 |                              |        |
| MSRB2-Bar-12-L2 | 621         | A      | -1        | 602           | 581             | 21          | 601       | 9      | 12785169  | 12785749 |                              |        |
| MSRB2-Bar-12-L3 | 85          | NA     | -1        | -1            |                 |             |           |        |           |          |                              |        |
| MSRB2-Bar-12-L4 | 161         | A      | 23        | 132           |                 |             |           |        |           |          |                              |        |
| MSRB2-Bar-13-L1 | 260         | A      | -1        | 228           | 227             | 1           | 227       | 1      | 10115418  | 10115192 |                              | 2      |
| MSRB2-Bar-13-L2 | 201         | A      | -1        | 176           | 144             | 32          | 175       | 1      | 10115500  | 10115643 |                              |        |
| MSRB2-Bar-14-R1 | 686         | A      | 68        | -1            | 593             | 90          | 682       | 1      | 25070441  | 25069849 | intergenic region            | 1      |
| MSRB2-Bar-14-L1 | 286         | A      | -1        | 254           | 250             | 9           | 258       | 1      | 25070464  | 25070713 |                              |        |
| MSRB2-Bar-15-R1 | 264         | Vector | 69        | 189           |                 |             |           |        |           |          |                              | 1      |
| MSRB2-Bar-15-L1 | 531         | A      | 50        | 512           | 465             | 47          | 511       | 11     | 2045597   | 2045133  | 5' UTR of J023012M05         |        |
| MSRB2-Bar-17-R1 | 187         | Vector | 69        | 154           |                 |             |           |        |           |          |                              | 1      |
| MSRB2-Bar-17-L1 | 482         | A      | -1        | 462           | 299             | 163         | 461       | 11     | 17171622  | 17171324 |                              |        |
| MSRB2-Bar-18-R1 | 210         | NA     | 64        | -1            |                 |             |           |        |           |          |                              | 1      |
| MSRB2-Bar-22-R1 | 509         | A      | 68        | -1            | 441             | 69          | 509       | 2      | 28088186  | 28088626 | intergenic region            | 1      |
| MSRB2-Bar-23-L1 | 721         | A      | -1        | 701           | 696             | 5           | 700       | 8      | 2470962   | 2470267  | intergenic region            | 1      |
| MSRB2-Bar-25-R1 | 106         | NA     | 71        | -1            |                 |             |           |        |           |          |                              | 1      |
| MSRB2-Bar-29-R1 | 242         | A      | 72        | 209           | 137             | 72          | 208       | 6      | 27732321  | 27732185 | 6th exon of Os06g0655100     | 1      |
| MSRB2-Bar-29-L1 | 222         | A      | -1        | 202           | 201             | 1           | 201       | 6      | 27731846  | 27731646 |                              |        |
| MSRB2-Bar-30-R1 | 278         | A      | 70        | 259           | 104             | 155         | 258       | 2      | 724370    | 724267   | intergenic region            | 1      |
| MSRB2-Bar-30-L1 | 674         | A      | -1        | -1            | 424             | 1           | 424       | chr.02 | 724532    | 724955   |                              |        |
| MSRB2-mini-1-L1 | 373         | A      | -1        | 334           | 329             | 5           | 333       | 9      | 22170328  | 22170655 | Intergenic                   | 1      |
| MSRB2-mini-2-R1 | 195         | Vector | 59        | -1            |                 |             |           |        |           |          |                              | 1      |
| MSRB2-mini-3-R1 | 400         | A      | 61        | -1            | 235             | 158         | 392       | 2      | 24459205  | 24458971 | Intergenic                   | 1      |
| MSRB2-mini-4-R1 | 297         | A      | 71        | -1            | 197             | 100         | 296       | 2      | 19779018  | 19778822 | Intergenic                   | 1      |
| MSRB2-mini-5-R1 | 439         | Vector | 71        | 411           |                 |             |           |        |           |          |                              | 1      |
